# Supplementary material for: Adverse effects of electronic cigarettes on the disease-naive oral microbiome
Source: PubMed Central journal article supplement — Sci Adv. 2020 May 27;6(22):eaaz0108. doi: 10.1126/sciadv.aaz0108 (PMC7253170; doi:10.1126/sciadv.aaz0108), 2020-05-27

## Supplementary Materials for

### **Adverse effects of electronic cigarettes on the disease-naïve oral microbiome**

Sukirth M. Ganesan, Shareef M. Dabdoub, Haikady N. Nagaraja, Michelle L. Scott, Surya Pamulapati, Micah L. Berman, Peter G. Shields, Mary Ellen Wewers, Purnima S. Kumar\*

\*Corresponding author. Email: [kumar.83@osu.edu](mailto:kumar.83@osu.edu)

Published 27 May 2020, *Sci. Adv.* **6**, eaaz0108 (2020)  
DOI: [10.1126/sciadv.aaz0108](https://doi.org/10.1126/sciadv.aaz0108)

#### **The PDF file includes:**

Fig. S1

#### **Other Supplementary Material for this manuscript includes the following:**

(available at [advances.sciencemag.org/cgi/content/full/6/22/eaaz0108/DC1](https://advances.sciencemag.org/cgi/content/full/6/22/eaaz0108/DC1))

Tables S1 to S6

**Supplemental Figure 1: Source of variation in the ENDS-influenced microbiome.** Non-metric multidimensional scaling (NMDS) plot of relative abundances of functional genes colored by flavoring type (A), nicotine amount (B) and time of exposure (C).

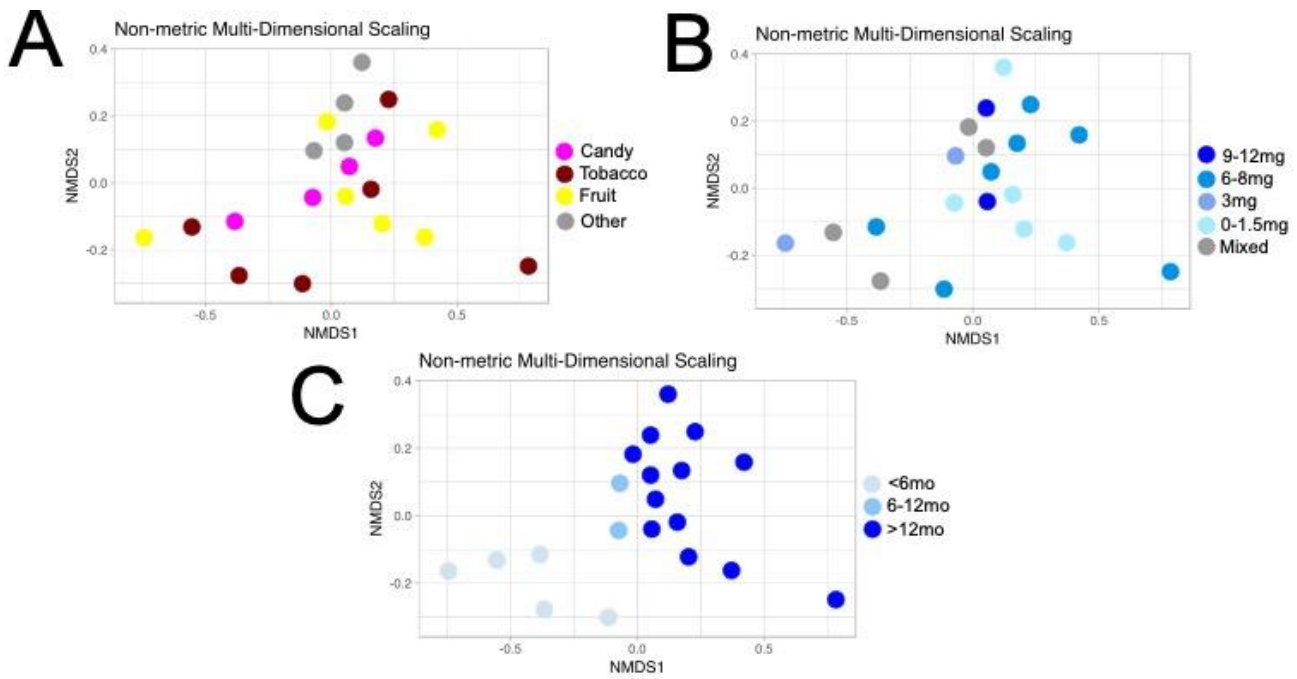

Supplement: aaz0108_SM.pdf [file aaz0108_SM.pdf]
